# Supplementary material for: Prevalence of malnutrition in patients at first medical oncology visit: the PreMiO study
Source: PubMed Central journal article supplement (PMC5668103; doi:10.18632/oncotarget.20168), 2017-08-10
Supplement: oncotarget-08-79884-s001.pdf [file oncotarget-08-79884-s001.pdf]

## Prevalence of malnutrition in patients at first medical oncology visit: the PreMiO study

### SUPPLEMENTARY MATERIALS

Supplementary Table 1: Patient-perceived disease severity by cancer site, based on VAS scores (N=1857)

| Cancer site                       | VAS disease severity<br>M0 | VAS disease severity<br>M1 | VAS disease severity<br>Total |
|-----------------------------------|----------------------------|----------------------------|-------------------------------|
| Breast                            | 5.5 ±3.2                   | 7.0 ±2.1                   | 5.7 ±3.0                      |
| Genitourinary tract               | 5.8 ±3.1                   | 5.8 ±3.0                   | 5.6 ±3.1                      |
| Colorectal                        | 4.8 ±3.2                   | 5.9 ±2.7                   | 5.3 ±3.0                      |
| Lung                              | 5.4 ±2.9                   | 6.9 ±2.5                   | 6.5 ±2.7                      |
| Other cancer <sup>1</sup>         | 5.4 ±3.0                   | 6.7 ±2.3                   | 5.6 ±2.9                      |
| Gastroesophageal                  | 5.3 ±3.3                   | 6.0 ±2.9                   | 5.7 ±3.0                      |
| Pancreatic                        | 5.2 ±3.6                   | 7.1 ±2.6                   | 6.4 ±3.1                      |
| Other GI                          | 6.6 ±3.1                   | 5.4 ±3.1                   | 5.3 ±3.4                      |
| Liver/bile duct                   | 3.4 ±3.8                   | 5.6 ±2.3                   | 5.2 ±2.7                      |
| Head and neck                     | 4.6 ±3.0                   | 6.8 ±2.1                   | 5.9 ±2.6                      |
| Unknown primary site <sup>2</sup> | 7.0                        | 5.4 ±2.5                   | 4.0 ±3.2                      |
| <b>ALL CANCERS</b>                | 5.4 ±3.2                   | 6.4 ±2.7                   | 5.7 ±3.0                      |

Mean patient-perceived severity score was 5.7 ±3.0 and patient-perceived curability was 6.0 ±3.1. Most of the of patients who perceived their disease as severe (score ≥6, N=983, 52.9%) as opposed to not severe (score <6, N=874, 47.1%) had breast (20.2% and 21.3%), lung (19.0% and 14.4%), genitourinary (16.3% and 16.5%) and colorectal cancer (15.3% and 19.1), (P=0.001), and had metastases (59.3% vs 39.8%), P<0.001.

<sup>1</sup>Other cancer includes: Sarcoma, Mesothelioma, Mesenchymal, Skin, Endocrine and Hematologic tumors.

<sup>2</sup> N=1 if SD not indicated

VAS, Visual analog scale of appetite (questionnaire); SD, standard deviation.

Cutoff points for the perception of higher disease severity is VAS ≥6. M0 = stage I-III, M1 = stage IV. Data are expressed as Mean ±SD.

**Supplementary Table 2: Patient perceived disease curability by cancer site, based on VAS scores (N=1857)**

| Cancer site                       | VAS disease curability<br>M0 | VAS disease curability<br>M1 | VAS disease curability<br>total |
|-----------------------------------|------------------------------|------------------------------|---------------------------------|
| Breast                            | 6.7 ±3.4                     | 6.6 ±2.2                     | 6.4 ±3.2                        |
| Genitourinary tract               | 6.8 ±3.2                     | 5.8 ±3.1                     | 6.0 ±3.3                        |
| Colorectal                        | 5.6 ±3.6                     | 6.1 ±2.8                     | 5.8 ±3.2                        |
| Lung                              | 5.5 ±2.9                     | 6.3 ±2.4                     | 6.1 ±2.5                        |
| Other cancer <sup>1</sup>         | 7.3 ±3.1                     | 6.1 ±2.4                     | 6.0 ±3.1                        |
| Gastroesophageal                  | 5.8 ±3.3                     | 5.6 ±2.7                     | 5.6 ±2.9                        |
| Pancreatic                        | 4.3 ±3.3                     | 6.3 ±2.3                     | 5.6 ±2.8                        |
| Other GI                          | 7.0 ±3.3                     | 5.1 ±3.1                     | 5.3 ±3.5                        |
| Liver/bile duct                   | 5.2 ±4.8                     | 5.8 ±2.0                     | 5.5 ±2.6                        |
| Head and neck                     | 5.9 ±3.5                     | 6.7 ±2.2                     | 6.2 ±2.7                        |
| Unknown primary site <sup>2</sup> | 5.0                          | 4.8 ±2.1                     | 3.5 ±2.8                        |
| <b>ALL CANCERS</b>                | 6.3 ±3.4                     | 6.1 ±2.6                     | 6.0 ±3.1                        |

Most of the patients who perceived their disease as difficult to cure or incurable (<6, N=856; 46%) as opposed to those who perceived their disease as curable (≥6, N=1001; 54%) had breast (18.3% and 23%), colorectal (17% and 17%), lung (16.6% and 17%) and genitourinary (15.7% and 17%) cancer (P=0.009), and had metastasis in 52% vs 48% of cases, P<0.001.

<sup>1</sup>Other cancer includes: sarcoma, mesothelioma, mesenchymal, skin, endocrine and hematologic tumors.

<sup>2</sup>N1 if SD not indicated.

VAS, Visual analog scale of appetite (questionnaire); SD, standard deviation

Cutoff points for the perception of poor disease curability is VAS <6. M0 = stage I-III, M1 = stage IV. Data are expressed as Mean ± SD.

**Supplementary Table 3: VAS appetite, FAACT and MNA score according to patient perception of disease severity and curability**

|                         | Not severe / easy to<br>cure (N=273) | Severe/easy to cure<br>(N =728) | Not severe /difficult to<br>cure (N=601) | Severe/difficult to<br>cure (N=255) | P value** |
|-------------------------|--------------------------------------|---------------------------------|------------------------------------------|-------------------------------------|-----------|
| <b>VAS<br/>appetite</b> | 69 ±21                               | 69 ±21                          | 68 ±24                                   | 56 ±23                              | <0.001    |
| <b>FAACT</b>            | 31 ±6                                | 30 ±6                           | 31 ±6                                    | 27 ±6                               | <0.001    |
| <b>MNA</b>              | 24 ±4                                | 23 ±4                           | 24 ±4                                    | 21 ±5                               | <0.001    |

Disease was judged by patients as “not severe and easy to cure” in 273 cases (14.7%), “not severe and difficult to cure” in 601 (32.4%), “severe/easy to cure” in 728 (39.2%), and “severe/difficult to cure” in 255 (13.7%).

\*Cutoff values: FAACT score ≤30 for anorexia; VAS score ≤70 for appetite loss representative of anorexia; MNA scores: malnourished <17; at risk of malnutrition, 17 to 23.5; well-nourished >23.5.

\*\*ANOVA univariate test.

VAS, Visual analog scale of appetite FAACT, Functional Assessment of Anorexia-Cachexia Therapy (questionnaire); MNA, Mini Nutritional Assessment; SD, standard deviation

Data are expressed as Mean ± SD\*.
